# Supplementary material for: Supplementation of branched-chain amino acids decreases fat accumulation in the liver through intestinal microbiota-mediated production of acetic acid
Source: PubMed Central journal article supplement (PMC7603487; doi:10.1038/s41598-020-75542-3), 2020-10-30
Supplement: 41598_2020_75542_MOESM1_ESM.pdf [file 41598_2020_75542_MOESM1_ESM.pdf]

1 **Supplementary information**

2

3 **Supplementation of branched-chain amino acids decreases fat accumulation in the liver through**  
4 **intestinal microbiota-mediated production of acetic acid**

5

6 Masao Iwao, Koro Gotoh, Mie Arakawa, Mizuki Endo, Koichi Honda, Masataka Seike, Kazunari  
7 Murakami and Hirotaka Shibata.

8

9

10

11

12

13

14

15

16

17

18

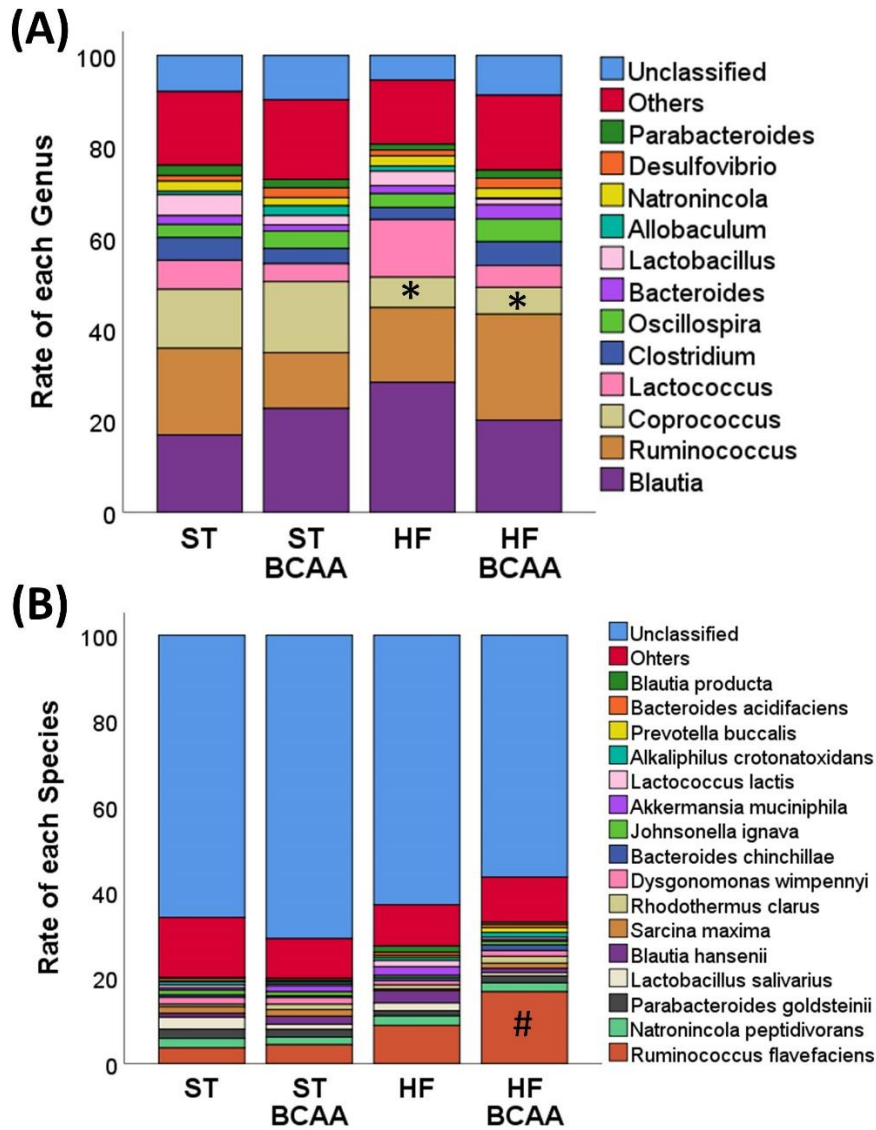

20

21 **Supplementary figure. S1. Proportion of each genus (A) and species (B) of intestinal flora in**

22 **Design 1.**

23 \*,  $p < 0.05$  vs ST and ST-BCAA; #  $p < 0.05$  vs ST, ST-BCAA and HF

24 ST, fed a standard diet; ST-BCAA, fed ST with added BCAAs; HF, fed a high-fat diet; and HF-BCAA,

25 fed a HF with added BCAAs.

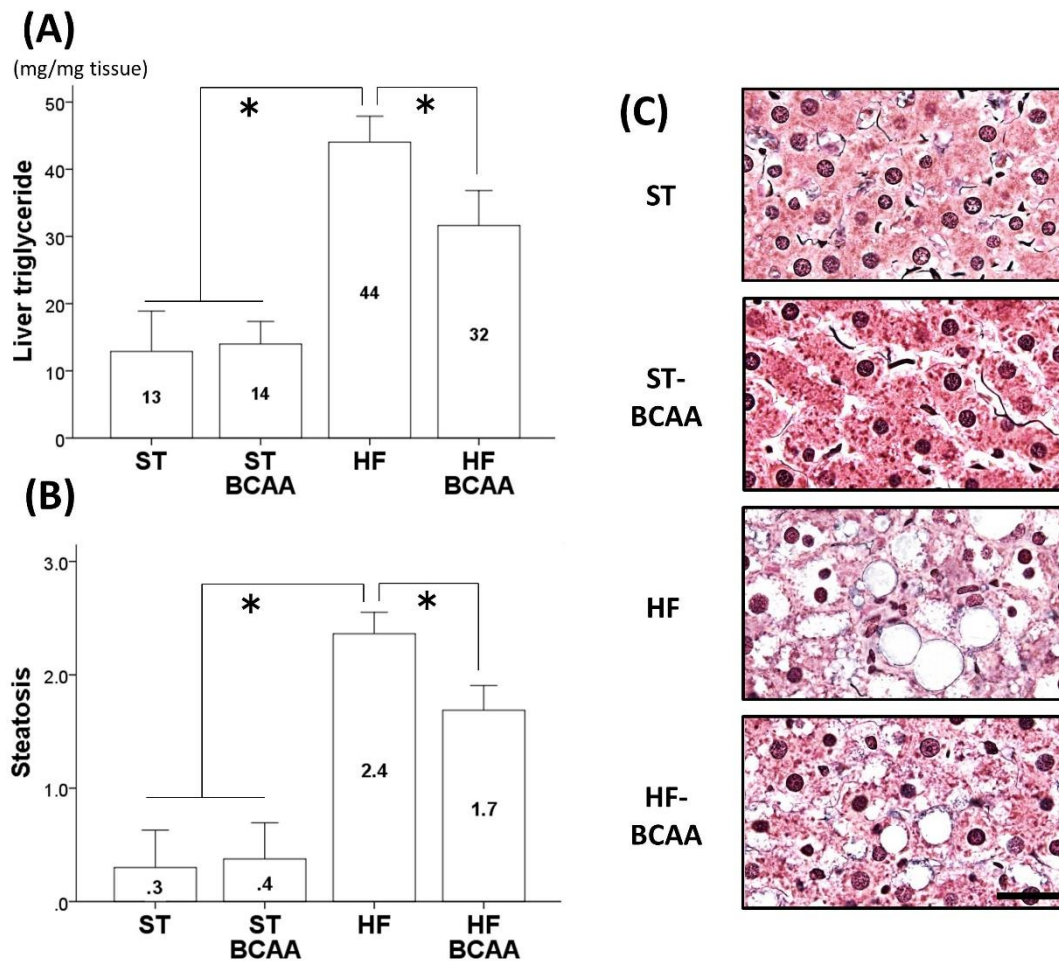

26

27 **Supplementary figure. S2. Effects of BCAAs on the HF-induced fat accumulation and fibrosis**  
 28 **in the liver.**

29 Contents of hepatic triglyceride (A) and steatosis, which is one of measures included in the NAFLD  
 30 activity score (B). Representative reticulin staining using silver impregnation of liver in each group  
 31 (C). Values are expressed as the means  $\pm$  S.D. \*,  $p < 0.05$  between the groups connected by a line.

32 Scale bar = 20  $\mu$ m.

33 ST, fed a standard diet; ST-BCAA, fed a ST with added BCAAs; HF, fed a high-fat diet; and HF-  
 34 BCAA, fed a HF with added BCAAs.

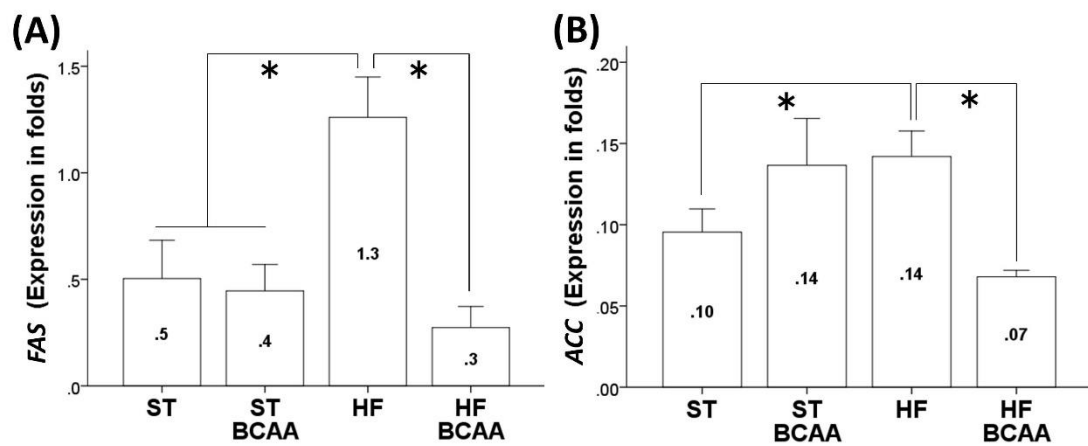

36

37 **Supplementary figure. S3. Effects of BCAAs on HF-induced hepatic lipogenesis-related gene**  
 38 **transcription of *FAS* (A) and *ACC* (B).**

39 \*,  $p < 0.05$  between the groups connected by a line

40 ST, fed the standard diet; ST-BCAA, fed ST with added BCAAs; HF, fed a high-fat diet; and HF-

41 BCAA, fed HF with added BCAAs.

42

43

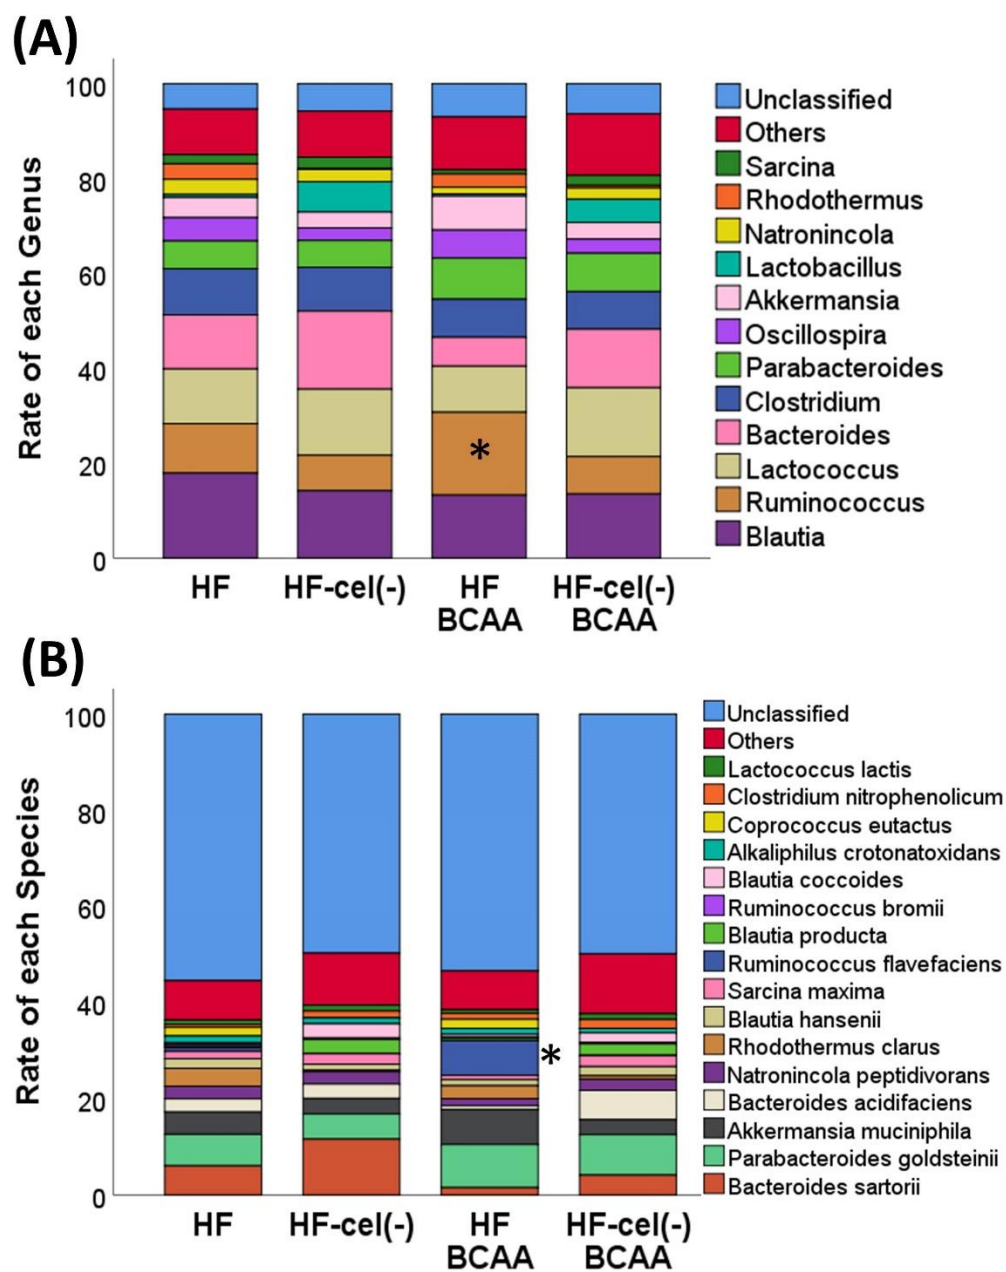

44

45 **Supplementary figure. S4. Rate of each genus (A) and species (B) of intestinal flora in Design 2.**

46 \*,  $p < 0.05$  vs other groups

47 HF, fed a high-fat diet; HF-cel(-), fed a HF without cellulose; HF-BCAA, fed a HF with added

48 BCAAs; and HF-cel(-)-BCAA, fed a cellulose-free HF with added BCAAs.

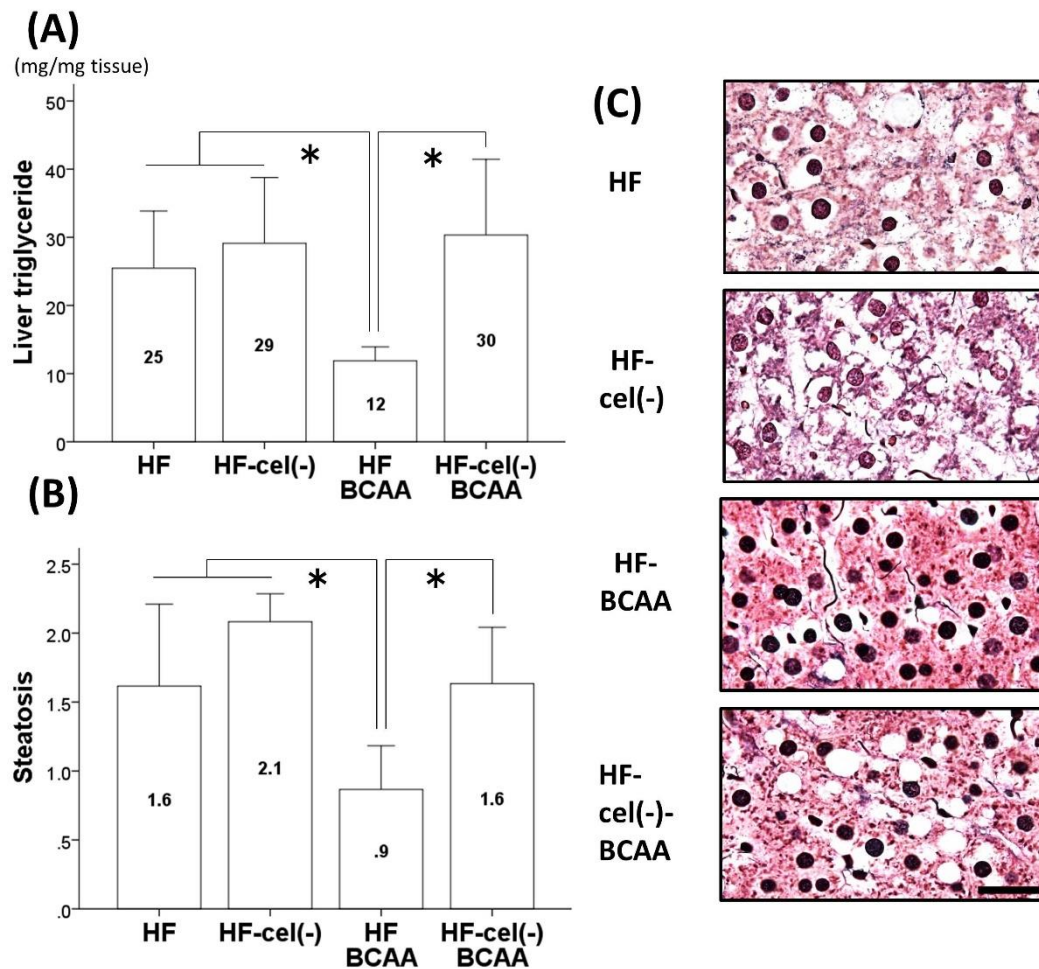

49

50 **Supplementary figure. S5. Effects of cellulose on the BCAA-induced reduction of hepatic fat**  
 51 **accumulation and fibrosis**

52 Contents of hepatic triglyceride (A) and steatosis, which is one of measures included in the NAFLD  
 53 activity score (B). Representative reticulin staining using silver impregnation of liver in each group

54 (C). Values are expressed as the means  $\pm$  S.D. \*,  $p < 0.05$  between the groups connected by a line.

55 Scale bar = 20  $\mu$ m.

56 HF, fed a high-fat diet; HF-cel(-), fed a HF without cellulose; HF-BCAA, fed a HF with added

57 BCAAs; and HF-cel(-)-BCAA, fed a cellulose-free HF with added BCAAs.

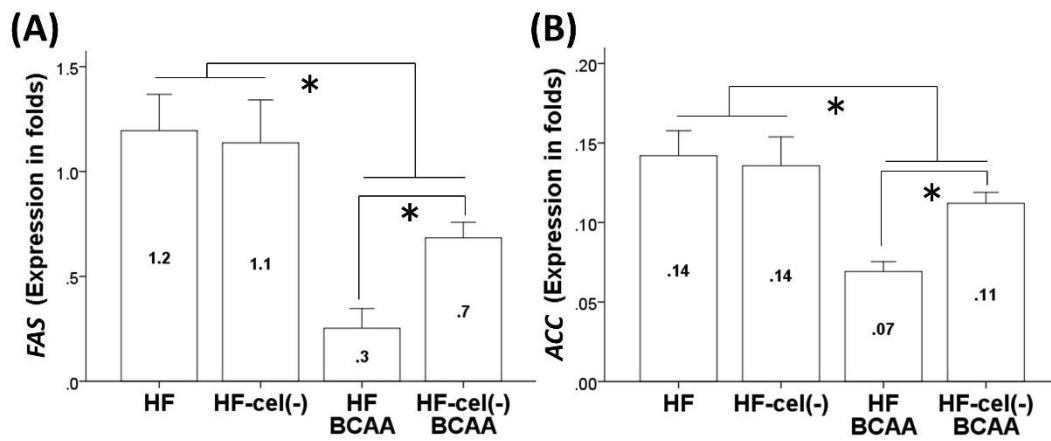

59

60 **Supplementary figure. S6. Effects of cellulose on the BCAA-induced improvement in hepatic**  
 61 **lipogenesis-related gene transcription of *FAS* (A) and *ACC* (B).**

62 \*,  $p < 0.05$  between the groups connected by a line

63 HF, fed a high-fat diet; HF-cel(-), fed a HF without cellulose; HF-BCAA, fed a HF with added

64 BCAAs; and HF-cel(-)-BCAA, fed a cellulose-free HF with added BCAAs.

65

66

| Diet                 | ST            |             | ST-BCAA        |             | HF            |             | HF-BCAA       |             | HF-cel(-)     |             | HF-cel(-)-BCAA |             |
|----------------------|---------------|-------------|----------------|-------------|---------------|-------------|---------------|-------------|---------------|-------------|----------------|-------------|
|                      | gm%           | kcal%       | gm%            | kcal%       | gm%           | kcal%       | gm%           | kcal%       | gm%           | kcal%       | gm%            | kcal%       |
| Protein              | 19            | 20          | 22             | 23          | 24            | 20          | 27            | 22          | 25            | 20          | 28             | 22          |
| Carbohydrate         | 67            | 70          | 65             | 67          | 41            | 35          | 38            | 33          | 44            | 35          | 41             | 33          |
| Fat                  | 4             | 10          | 4              | 10          | 24            | 45          | 24            | 45          | 25            | 45          | 25             | 45          |
| Total                |               | 100         |                | 100         |               | 100         |               | 100         |               | 100         |                | 100         |
| kcal/gm              | 3.8           |             | 3.8            |             | 4.7           |             | 4.7           |             | 4.7           |             | 4.7            |             |
| <b>Ingredient</b>    | <b>gm</b>     | <b>kcal</b> | <b>gm</b>      | <b>kcal</b> | <b>gm</b>     | <b>kcal</b> | <b>gm</b>     | <b>kcal</b> | <b>gm</b>     | <b>kcal</b> | <b>gm</b>      | <b>kcal</b> |
| Casein without BCAAs | 159           | 646         | 159            | 646         | 159           | 646         | 159           | 646         | 159           | 646         | 159            | 646         |
| Leucine, L           | 17            | 58          | 29.2           | 107         | 17            | 58          | 29.2          | 107         | 17            | 58          | 29.2           | 107         |
| Isoleucine, L        | 10            | 40          | 16.1           | 64          | 10            | 40          | 16.1          | 64          | 10            | 40          | 16.1           | 64          |
| Valine, L            | 14            | 56          | 21.4           | 86          | 14            | 56          | 21.4          | 86          | 14            | 56          | 21.4           | 86          |
| L-Cystine            | 3             | 12          | 3              | 12          | 3             | 12          | 3             | 12          | 3             | 12          | 3              | 12          |
| Corn Starch          | 452.2         | 1809        | 426.5          | 1706        | 72.8          | 291         | 47.1          | 188         | 72.8          | 291         | 47.1           | 188         |
| Maltodextrin 10      | 75            | 300         | 75             | 300         | 100           | 400         | 100           | 400         | 100           | 400         | 100            | 400         |
| Sucrose              | 172.8         | 691         | 172.8          | 691         | 172.8         | 691         | 172.8         | 691         | 172.8         | 691         | 172.8          | 691         |
| Cellulose            | 50            | 0           | 50             | 0           | 50            | 0           | 50            | 0           | 0             | 0           | 0              | 0           |
| Soybean Oil          | 25            | 225         | 25             | 225         | 25            | 225         | 25            | 225         | 25            | 225         | 25             | 225         |
| Lard                 | 20            | 180         | 20             | 180         | 177.5         | 1598        | 177.5         | 1598        | 177.5         | 1598        | 177.5          | 1598        |
| Meneral Mix          | 10            | 0           | 10             | 0           | 10            | 0           | 10            | 0           | 10            | 0           | 10             | 0           |
| DiCalcium Phosphate  | 13            | 0           | 13             | 0           | 13            | 0           | 13            | 0           | 13            | 0           | 13             | 0           |
| Calcium Carbonate    | 5.5           | 0           | 5.5            | 0           | 5.5           | 0           | 5.5           | 0           | 5.5           | 0           | 5.5            | 0           |
| Potassium Citrate    | 16.5          | 0           | 16.5           | 0           | 16.5          | 0           | 16.5          | 0           | 16.5          | 0           | 16.5           | 0           |
| Vitamin Mix          | 10            | 40          | 10             | 40          | 10            | 40          | 10            | 40          | 10            | 40          | 10             | 40          |
| Choline Bitartrate   | 2             | 0           | 2              | 0           | 2             | 0           | 2             | 0           | 2             | 0           | 2              | 0           |
| Yellow Dye           | 0.04          | 0           | 0.025          | 0           | 0             | 0           | 0             | 0           | 0.025         | 0           | 0.04           | 0           |
| Red Dye              | 0.01          | 0           | 0              | 0           | 0.05          | 0           | 0             | 0           | 0.025         | 0           | 0              | 0           |
| Blue Dye             | 0             | 0           | 0.025          | 0           | 0             | 0           | 0.05          | 0           | 0             | 0           | 0.01           | 0           |
| <b>Total</b>         | <b>1055.5</b> | <b>4057</b> | <b>1055.05</b> | <b>4057</b> | <b>858.15</b> | <b>4057</b> | <b>858.15</b> | <b>4057</b> | <b>858.15</b> | <b>4057</b> | <b>858.15</b>  | <b>4057</b> |

68

69 **Supplementary figure. S7. Ingredients and nutrient compositions of each diet.**

70 ST, fed a standard diet; ST-BCAA, fed a ST with added BCAAs; HF, fed a high-fat diet; HF-BCAA,

71 fed a HF with added BCAAs; HF-cel(-), fed a HF without cellulose; and HF-cel(-)-BCAA, fed a

72 cellulose-free HF with added BCAAs.

73

74

75



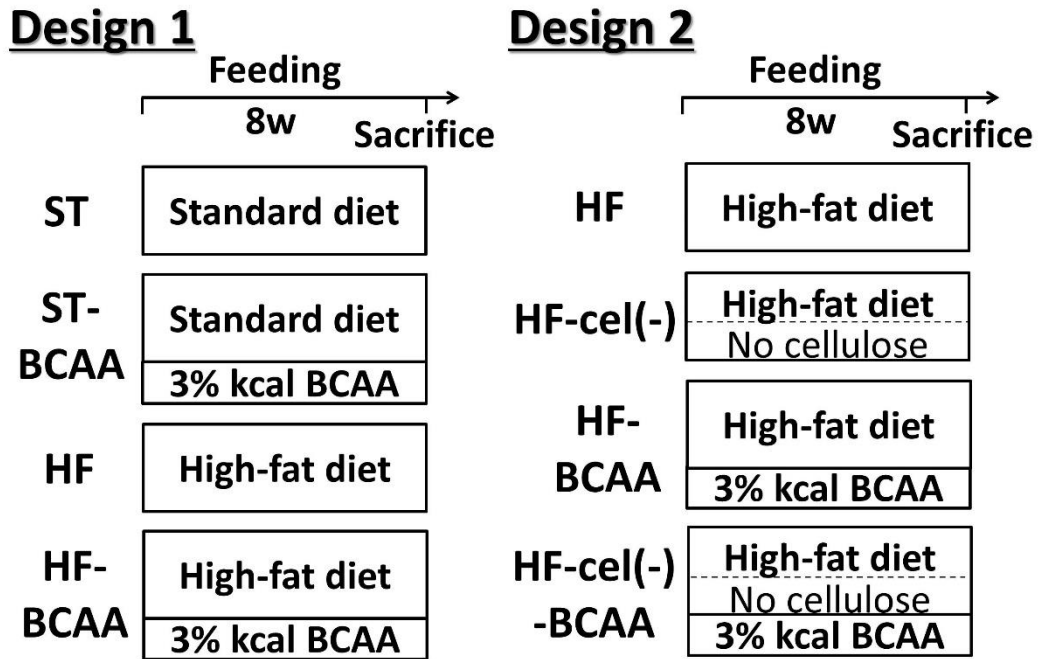

77

78 **Supplementary figure. S8. Protocol of experimental Designs 1 and 2.**

79 ST, fed a standard diet; ST-BCAA, fed a ST with added BCAAs; HF, fed a high-fat diet; HF-BCAA,

80 fed a HF with added BCAAs; HF-cel(-), fed a HF without cellulose; and HF-cel(-)-BCAA, fed a

81 cellulose-free HF with added BCAAs.

82

83

84

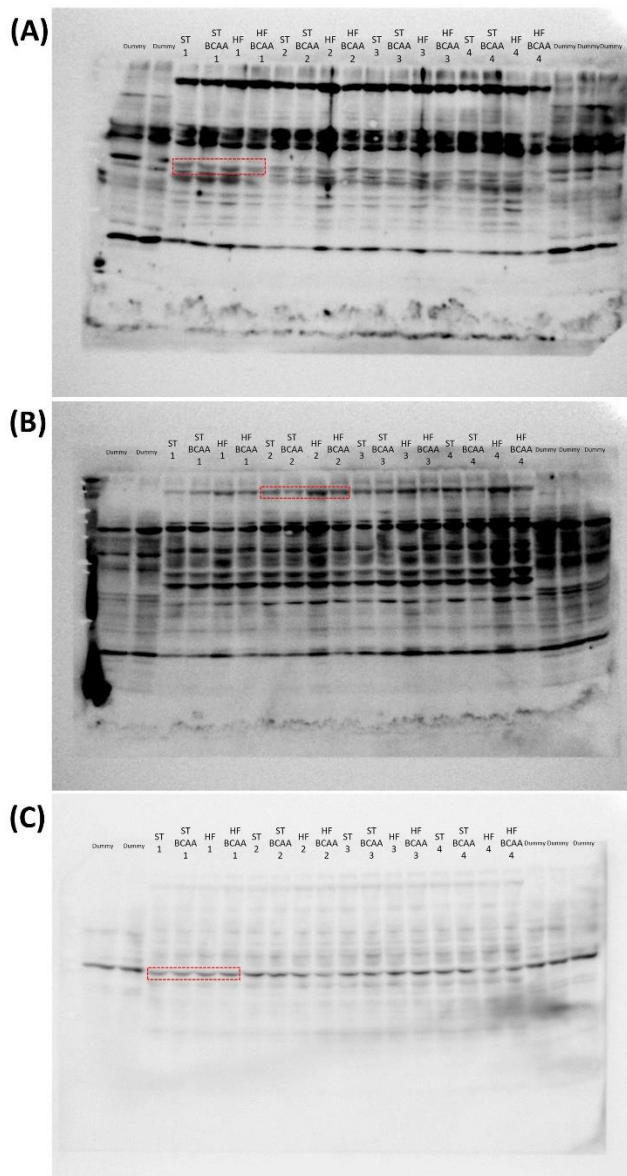

85

86 **Supplementary figure. S9. Full-length western blot gels of FAS (A), ACC (B) and  $\beta$ -actin (C) in**

87 **Design 1.**

88 The samples derive from the same experiment and those gels were processed in parallel. The trimmed

89 area is indicated by the red box line.

90 ST, fed the standard diet; ST-BCAA, fed ST with added BCAAs; HF, fed a high-fat diet; and HF-

91 BCAA, fed HF with added BCAAs.

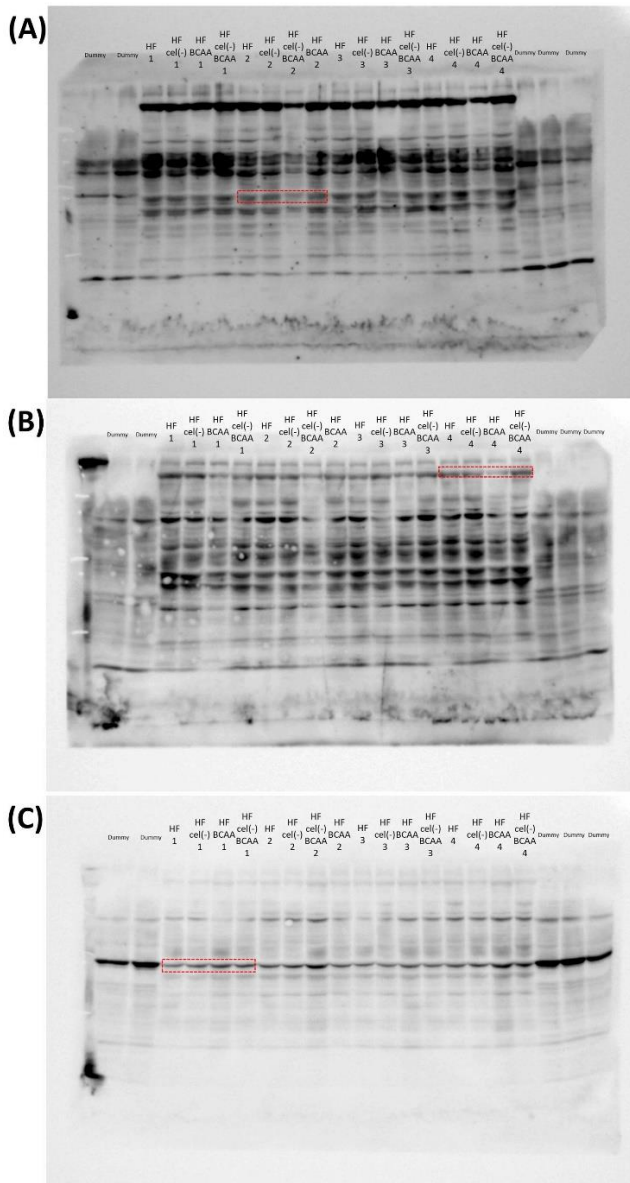

92

93 **Supplementary figure. S10. Full-length western blot gels of FAS (A), ACC (B) and  $\beta$ -actin (C) in**

94 **Design 2.**

95 The samples derive from the same experiment and those gels were processed in parallel. The trimmed

96 area is indicated by the red box line.

97 HF, fed a high-fat diet; HF-cel(-), fed a HF without cellulose; HF-BCAA, fed a HF with added

98 BCAAs; and HF-cel(-)-BCAA, fed a cellulose-free HF with added BCAAs.

| <b>Design 1</b>             | <b>ST</b>    | <b>ST-BCAA</b> | <b>HF</b>    | <b>HF-BCAA</b>           |
|-----------------------------|--------------|----------------|--------------|--------------------------|
| <b>Daily intake (kcal)</b>  | 95.3 ± 2.4   | 98.2 ± 3.1     | 106.3 ± 3.5  | 113.8 ± 4.6 <sup>*</sup> |
| <b>Body weight (g)</b>      | 598.2 ± 13.3 | 589.3 ± 16.3   | 642.0 ± 18.3 | 641.2 ± 17.3             |
| <b>Serum BCAA (µg/ml)</b>   | 69.9 ± 2.7   | 73.1 ± 4.3     | 62.6 ± 1.5   | 71.8 ± 2.1               |
| <b>ALT (U/L)</b>            | 33.1 ± 5.1   | 49.5 ± 15.0    | 33.6 ± 4.9   | 31.4 ± 4.9               |
| <b>Total-chol (mg/dL)</b>   | 86.3 ± 5.3   | 85.3 ± 8.6     | 70.8 ± 3.1   | 80.6 ± 5.4               |
| <b>Triglyceride (mg/dL)</b> | 139.7 ± 8.6  | 124.9 ± 11.3   | 114.1 ± 14.8 | 126.8 ± 30.7             |
| <b>Glucose (mg/dL)</b>      | 130.1 ± 10.8 | 128.7 ± 14.1   | 143.7 ± 5.6  | 142.9 ± 5.8              |

100 **Supplementary table. S1. Daily intake, body weight and biochemical data after 8 weeks of**  
 101 **feeding in each group of Designs 1.**

102 <sup>\*</sup>, p < 0.05 vs. ST, ST-BCAA. Total-chol: total cholesterol.

103

104

105

106

107

108

109

110

111

| <b>Design 2</b>             | <b>HF</b>    | <b>HF-cel (-)</b> | <b>HF-BCAA</b> | <b>HF-cel (-)-BCAA</b> |
|-----------------------------|--------------|-------------------|----------------|------------------------|
| <b>Daily intake (kcal)</b>  | 113.5 ± 4.0  | 115.1 ± 3.8       | 109.1 ± 2.8    | 117.6 ± 4.7            |
| <b>Body weight (g)</b>      | 696.2 ± 17.4 | 688.2 ± 16.1      | 665.4 ± 7.9    | 662.8 ± 10.5           |
| <b>ALT (U/L)</b>            | 31.4 ± 1.8   | 33.1 ± 2.2        | 27.7 ± 2.4     | 27.5 ± 1.8             |
| <b>Total-chol (mg/dL)</b>   | 101.5 ± 6.8  | 102.3 ± 8.2       | 93.9 ± 9.4     | 107.1 ± 5.1            |
| <b>Triglyceride (mg/dL)</b> | 129.8 ± 8.0  | 130.2 ± 13.4      | 127.0 ± 9.9    | 121.9 ± 15.9           |
| <b>Glucose (mg/dL)</b>      | 153.9 ± 10.9 | 144.5 ± 7.1       | 153.3 ± 7.3    | 158.3 ± 9.0            |

112 **Supplementary table. S2. Daily intake, body weight and biochemical data after 8 weeks of**

113 **feeding in each group of Designs 2.**

114 Total-chol: total cholesterol.

115

116

117

118

119

120

121

122

123
